# Supplementary material for: Rapid Identification of Common Poisonous Plants in China Using DNA Barcodes
Source: Frontiers journal article supplement (doi:10.3389/fevo.2021.698418), 2021-08-23
Supplement: Table_1.docx [file Table_1.docx]

**Table S1. Information and GenBank accession numbers of the samples in this study.**

| **Family** | **Genus** | **Species** | **Number** | **location** | **trnH-psbA** | **rbcL** | **ITS** | **matK** |
| --- | --- | --- | --- | --- | --- | --- | --- | --- |
| *Fabaceae* | *Phaseolus spp.* | *P. lunatus* | 01 | Jiangsu | MW940678 | MW960593 | MW843820 | - |
|  |  | *P. lunatus* | 02 | Jiangsu | MW940679 | MW960607 | MW843821 | - |
|  |  | *P. vulgaris* | 01 | Qingdao | - | - | MW843822 | - |
|  |  | *P. vulgaris* | 02 | Qingdao | MW940680 | MW960611 | - | - |
|  |  | *P. vulgaris* | 03 | Qingdao | MW940687 | MW960608 | - | - |
|  |  | *P. vulgaris* | 04 | Qingdao | MW940681 | MW929347 | - | - |
|  |  | *P. vulgaris* | 05 | Qingdao | MW940682 | MW960594 | - | - |
|  |  | *P. vulgaris* | 06 | Qingdao | MW940683 | MW929348 | MW843823 | - |
|  |  | *P. vulgaris* | 07 | Qingdao | MW940684 | MW960595 | - | - |
|  |  | *P. vulgaris* | 08 | Qingdao | MW940685 | MW929349 | - | - |
|  |  | *P. vulgaris* | 09 | Qingdao | MW940686 | MW960596 | MW843824 | - |
|  |  | *P. vulgaris* | 10 | Qingdao | MW940688 | MW960597 | MW843825 | - |
|  |  | *P. vulgaris* | 11 | Qingdao | MW940689 | MW960598 | - | - |
|  |  | *P. vulgaris* | 12 | Qingdao | MW940690 | MW960599 | MW843826 | - |
|  |  | *P. vulgaris* | 13 | Qingdao | MW940691 | MW929350 | MW843827 | - |
|  | *Lablab spp.* | *L. purpureus* | 01 | Jiangsu | - | MW929343 | - | - |
|  |  | *L. purpureus* | 02 | Jiangsu | - | MW960590 | - | - |
|  | *Glycine spp.* | *G. max* | 01 | Zhejiang | MW940665 | MW929339 | MW843815 | - |
|  |  | *G. max* | 02 | Qingdao | MW940666 | MW960603 | - | - |
|  |  | *G. max* | 03 | Qingdao | MW940667 | MW929340 | - | - |
|  | *Vicia spp.* | *V. faba* | 01 | Qingdao | MW940700 | MW929351 | MW843838 | - |
|  | *Vigna spp.* | *V. unguiculata* | 01 | Qingdao | - | MW960626 | MW843839 | - |
|  |  | *V. unguiculata* | 02 | Qingdao | - | MW960624 | MW843840 | - |
|  |  | *V. unguiculata* | 03 | Qingdao | - | MW929352 | - | - |
|  |  | *V. unguiculata* | 04 | Qingdao | - | MW960625 | - | - |
|  |  | *V. unguiculata* | 05 | Qingdao | - | MW929353 | MW843841 | - |
|  |  | *V. unguiculata* | 06 | Qingdao | - | MW960620 | MW843842 | - |
|  | *Canavalia spp.* | *C. gladiata* | 01 | Jiangsu | - | MW960580 | - | - |
|  |  | *C. gladiata* | 02 | Jiangsu | - | MW960581 | - | - |
|  | *Abrus spp.* | *A. cantoniensis* | 01 | Jiangsu | MW940641 | MW960560 | MW843795 | - |
|  |  | *A. cantoniensis* | 02 | Jiangsu | MW940642 | MW960561 | - | - |
|  | *Acacia spp.* | *A. confusa* | 01 | Jiangsu | - | MW960562 | MW843796 | - |
|  | *Adenanthera spp.* | *A. microsperma* | 01 | Jiangsu | MW940644 | MW960563 | - | MW961234 |
| *Solanaceae* | *Datura spp.* | *D. metel* | 15 | Guangxi | MW940649 | MW960569 | MW843799 | MW961237 |
|  |  | *D. stramonium* | 01 | Jiangsu | MW940650 | MW960584 | MW843800 | MW961238 |
|  |  | *D. stramonium* | 02 | Jiangsu | MW940651 | MW960570 | MW843801 | MW961239 |
|  |  | *D. stramonium* | 03 | Jiangsu | MW940652 | MW960571 | MW843802 | MW961240 |
|  |  | *D. stramonium* | 04 | Jiangsu | MW940653 | MW960572 | MW843803 | - |
|  |  | *D. stramonium* | 05 | Jiangsu | MW940654 | MW960573 | MW843804 | MW961241 |
|  |  | *D. stramonium* | 06 | Jiangsu | MW940655 | MW960574 | MW843805 | MW961242 |
|  |  | *D. stramonium* | 07 | Jiangsu | MW940656 | MW960587 | MW843806 | MW961243 |
|  |  | *D. stramonium* | 08 | Jiangsu | MW940657 | MW960575 | MW843807 | MW961244 |
|  |  | *D. stramonium* | 09 | Jiangsu | MW940658 | MW960588 | MW843808 | MW961245 |
|  |  | *D. stramonium* | 10 | Jiangsu | MW940659 | MW960585 | MW843809 | MW961246 |
|  |  | *D. stramonium* | 11 | Jiangsu | MW940660 | MW960576 | MW843810 | MW961247 |
|  |  | *D. stramonium* | 12 | Jiangsu | MW940661 | MW960577 | MW843811 | MW961248 |
|  |  | *D. stramonium* | 13 | Jiangsu | MW940662 | MW960578 | MW843812 | MW961249 |
|  |  | *D. stramonium* | 14 | Jiangsu | MW940663 | MW960579 | MW843813 | MW961250 |
|  | *Lycopersicon spp.* | *L. esculentum* | 01 | Zhejiang | - | MW929344 | MW843818 | MW961255 |
|  | *Solanum spp.* | *S. tuberosum* | 01 | Zhejiang | - | MW960618 | - | MW961256 |
|  |  | *S. tuberosum* | 02 | Zhejiang | - | MW960614 | - | MW961257 |
|  |  | *S. khasianum* | 01 | Guangxi | MW940698 | MW960619 | MW843834 | MW961231 |
|  |  | *S. khasianum* | 02 | Guangxi | MW940699 | MW960615 | MW843835 | MW961232 |
| *Araceae* | *Alocasia spp.* | *A. cucullata* | 01 | Jiangsu | - | MW960586 | - | - |
|  |  | *A. cucullata* | 02 | Jiangsu | MW940645 | MW960565 | - | MW961236 |
|  |  | *A. macrorrhiza* | 01 | Jiangsu | MW940646 | MW960566 | - | MW961235 |
|  |  | *A. macrorrhiza* | 02 | Jiangsu | MW940647 | MW960567 | - | - |
|  | *Colocasia spp.* | *C. esculenta* | 01 | Jiangsu | - | MW960582 | - | MW961254 |
|  |  | *C. esculenta* | 02 | Jiangsu | - | MW960583 |  | - |
| *Euphorbiaceae* | *Manihot spp.* | *M. esculenta* | 01 | Guangxi | MW940673 | MW929346 | - | - |
|  |  | *M. esculenta* | 02 | Guangxi | MW940674 | MW960605 | - | - |
|  | *Ricinus spp.* | *R. communis* | 01 | Guangxi | MW940697 | MW960617 | MW843831 | MW961229 |
|  |  | *R. communis* | 02 | Jiangsu | - | MW960613 | MW843832 | - |
|  |  | *R. communis* | 03 | Jiangsu | - | MW960622 | MW843833 | MW961230 |
|  | *Vernicia spp.* | *V. fordii* | 01 | Jiangsu | - | MW960616 | MW843836 | - |
|  |  | *V. fordii* | 02 | Jiangsu | - | MW960623 | MW843837 | - |
| *Phytolaccaceae* | *Phytolacca spp.* | *P. americana* | 01 | Jiangsu | MW940692 | MW960609 | MW843828 | - |
|  |  | *P. americana* | 04 | Jiangsu | MW940693 | MW960610 | MW843829 | MW961251 |
| *Rosaceae* | *Prunus spp.* | *P. armeniaca* | 01 | Jiangsu | MW940694 | MW960600 | MW843830 | - |
|  |  | *P. armeniaca* | 02 | Jiangsu | MW940695 | MW960601 | - | - |
|  |  | *P. davidiana* | 01 | Jiangsu | MW940696 | MW960612 | - | - |
| *Aristolochiaceae* | *Asarum spp.* | *A. heterotropoides* | 01 | Jiangsu | MW940648 | MW960568 | MW843798 | MW961253 |
| *Ranunculaceae* | *Aconitum spp.* | *A. barbatum* | 01 | Jiangsu | MW940643 | MW960564 | MW843797 | - |
| *Malvaceae* | *Gossypium spp.* | *G. hirsutum* | 01 | Zhejiang | MW940668 | MW929341 | MW843817 | - |
|  |  | *G. hirsutum* | 02 | Jiangsu | MW940669 | MW960621 | MW843816 | - |
| *Liliaceae* | *Hemerocallis spp.* | *H. fulva* | 01 | Guangxi | MW940670 | MW960589 | - | - |
|  |  | *H. fulva* | 02 | Qingdao | MW940671 | MW960604 | - | - |
|  |  | *H. fulva* | 03 | Qingdao | - | MW929342 | - | MW961252 |
| *Papaveraceae* | *Macleaya spp.* | *M. cordata* | 01 | Guangxi | MW940672 | MW929345 | MW843819 | MW961228 |
| *Apocynaceae* | *Nerium spp.* | *N. oleander* | 01 | Zhejiang | MW940675 | MW960591 | - | - |
|  |  | *N. oleander* | 02 | Zhejiang | MW940676 | MW960606 | - | - |
|  |  | *N. oleander* | 03 | Zhejiang | MW940677 | MW960592 | - | - |
| *Loganiaceae* | *Gelsemium spp.* | *G. elegans* | 01 | Guangxi | MW940664 | MW960602 | MW843814 | MW961233 |
