# Supplementary material for: Rapid Identification of Common Poisonous Plants in China Using DNA Barcodes
Source: Frontiers journal article supplement (doi:10.3389/fevo.2021.698418), 2021-08-23
Supplement: Table_2.docx [file Table_2.docx]

**Table S2. GenBank accession numbers of samples from the NCBI**

| **Family** | **Genus** | **Species** | **trnH-psbA** | **rbcL** | **ITS** |
| --- | --- | --- | --- | --- | --- |
| *Ranunculaceae* | *Aconitum spp.* | *A. barbatum* | KX931218、KX931219 | JF940658、JF940659.1 | KY417265、KY417292 |
| *Aristolochiaceae* | *Asarum spp.* | *A. heterotropoides* | - | KU853436 | AB247106、AB247129 |
| *Araceae* | *Alocasia spp.* | *A. cucullata* | MH837782 | - | - |
| *Malvaceae* | *Gelsemium spp.* | *G. elegans* | MN115294、MN115301 | MN056254、MN056327 | HG004870 |
| *Papaveraceae* | *Macleaya spp.* | *M. cordata* | MT178411 | MF372858、MF372859 | AY328307、MF372841 |
| *Rosaceae* | *Prunus spp.* | *P. davidiana* | NC 039735、MH460864 | GQ436590、MN722388 | - |
|  |  | *P. armeniaca* | - | - | MN722065、AF318756 |
| *Euphorbiaceae* | *Ricinus spp.* | *R. communis* | MH749284、GU135325 | - | - |
| *Solanaceae* | *Solanum spp.* | *S. lycopersicum* | - | MH588526、MH722375 | AJ300201 |
|  | *Datura spp.* | *D. metel* | JX467620 | JN244365、JN244366 | MH768322 |
| *Fabaceae* | *Vicia spp.* | *V. faba* | MG947138 | KP896810 | FJ212318 |
|  | *Acacia spp.* | *A. confusa* | - | GQ436378、KF532030、KF532046 | JX997271、JX997278 |
|  | *Abrus spp.* | *A. cantoniensis* | - | - | MK346046 |
|  | *Adenanthera spp.* | *A. microsperma* | GU396783 | GQ436377 | - |
|  | *Lablab spp.* | *L._purpureus* | GQ434965 | - | AY583516、FJ599758 |
|  | *Macroptilium spp.* | *M._atropurpureum* | MH621977 | EU717268、MH767689 | AF115138、AY508737、MH768285、MH891862 |
|  |  | *M．lathyroides* | MH621978 | KJ773670、MH549910 | AY508740、MH891860、MH891861 |
|  |  | *M．uniflorum* | - | EU717269、LT576832 | MT269036、MT269037 |
|  | *Phaseolus spp.* | *P．coccineus* | JX495464 | GQ411655、GQ411656 | GQ411781、GQ411783、KF943725、KF943726 |
|  | *Psophocarpus spp.* | *P．tetragonolobus_* | - | EU717271、MN966643 | FJ873690、FJ873692、FJ873693 |
|  | *Vigna spp.* | *V．angularis* | KX087549、KX087550 | MH391975、MH391976、MH391977 | LC414440、LC414441 |
|  |  | *V．luteola* | KX087594、KX087595、KX087593 | KX087437、KX087438、KX087439 | LC082023、AY583519 |
|  |  | *V．radiata* | MK578166、MW459318 | MH391985、MH391986、MH391987 | LC064348、LC064349、LC193799 |
|  |  | *V．reflexopilosa* | KX087637、KX087638、KX087639 | KX087482、KX087483 | LC414494、LC414495、LC414496 |
|  |  | *V．riukiuensis* | KX087643、KX087644、KX087645 | KX087488、KX087489 | LC414523、LC414524 |
|  |  | *V．trilobata* | KX087656、KX087657、KX087658 | KX087501、KX087502 | LT717392、LT717393 |
|  |  | *V．umbellata* | KX087662、KX087663 | MH391994、MH391995、MH391996 | LC414506、LC414507、LC414508 |
|  |  | *V．unguiculata* | KX087674、KX087675 | - | - |
|  |  | *V．vexillata* | KX087688、KX087689、KX087690、KX087693 | KX087536、KX087537 | LC082037、LC082038 |
|  |  | *V．marina* | KX087694、KX087695 | KX087538、KX087539 | LC082022、MH768298、MH768299 |
|  |  | *V．minima* | - | - | LC414514、LC414515 |
|  | *Dysolobium spp.* | *D．grande* | - | KX527443 | - |
