# Supplementary material for: Rapid Identification of Common Poisonous Plants in China Using DNA Barcodes
Source: Frontiers journal article supplement (doi:10.3389/fevo.2021.698418), 2021-08-23
Supplement: Table_3.docx [file Table_3.docx]

**Table S3. Amplification and sequencing of 13 species after simulated gastric fluid digestion.**

| **Species** | **Number** | **Digestion time(min)** | **trnH-psbA** | **rbcL** | **ITS** | **matK** |
| --- | --- | --- | --- | --- | --- | --- |
| Datura stramonium | 02 | 0 | S | S | S | S |
|  |  | 120 | S | S | S | S |
|  |  | 240 | S | S | S | S |
|  |  | 360 | S | S | S | S |
| Gossypium hirsutum | 01 | 0 | S | S | S | S |
|  |  | 120 | S | S | S | SF |
|  |  | 240 | S | S | S | SF |
|  |  | 360 | S | S | S | SF |
| Ricinus communis | 03 | 0 | SF | S | S | S |
|  |  | 120 | SF | S | S | S |
|  |  | 240 | SF | S | S | S |
|  |  | 360 | SF | S | S | AF |
| Abrus cantoniensis | 02 | 0 | S | S | SF | AF |
|  |  | 120 | S | S | SF | AF |
|  |  | 240 | S | S | SF | AF |
|  |  | 360 | S | S | SF | AF |
| Vernicia fordii | 01 | 0 | SF | S | S | S |
|  |  | 120 | SF | S | S | S |
|  |  | 240 | SF | S | S | S |
|  |  | 360 | SF | S | S | AF |
| Lablab purpureus | 02 | 0 | SF | S | SF | AF |
|  |  | 120 | SF | S | SF | AF |
|  |  | 240 | SF | S | SF | AF |
|  |  | 360 | SF | S | SF | AF |
| Phaseolus lunatus | 01 | 0 | S | S | S | AF |
|  |  | 120 | S | S | S | AF |
|  |  | 240 | S | S | S | AF |
|  |  | 360 | S | S | S | AF |
| Glycine max | 01 | 0 | S | S | S | SF |
|  |  | 120 | S | S | S | SF |
|  |  | 240 | S | S | S | SF |
|  |  | 360 | S | S | S | AF |
| Phaseolus vulgaris | 08 | 0 | S | S | SF | AF |
|  |  | 120 | S | S | S | AF |
|  |  | 240 | S | S | S | AF |
|  |  | 360 | S | S | S | AF |
| Lycopersicon esculentum | 01 | 0 | SF | S | SF | S |
|  |  | 120 | SF | S | S | S |
|  |  | 240 | SF | S | S | S |
|  |  | 360 | SF | S | S | SF |
| Manihot esculenta |  | 0 | S | S | SF | AF |
|  | 01 | 120 | S | S | SF | AF |
|  |  | 240 | S | S | AF | AF |
|  |  | 360 | S | S | AF | AF |
| Adenanthera microsperma | 01 | 0 | S | S | AF | S |
|  |  | 120 | S | S | AF | S |
|  |  | 240 | S | S | AF | S |
|  |  | 360 | S | S | AF | SF |
| Prunus davidiana | 01 | 0 | S | S | SF | SF |
|  |  | 120 | S | S | SF | SF |
|  |  | 240 | S | S | SF | SF |
|  |  | 360 | S | S | SF | SF |

S Success; AF Amplification failure; SF Sequencing failure
